# Supplementary material for: Omega-3 Polyunsaturated Fatty Acids Provoke Apoptosis in Hepatocellular Carcinoma through Knocking Down the STAT3 Activated Signaling Pathway: In Vivo and In Vitro Study
Source: MDPI journal article supplement (doi:10.3390/molecules27093032), 2022-05-09
Supplement: s1 [file s1]

## Supplementary file

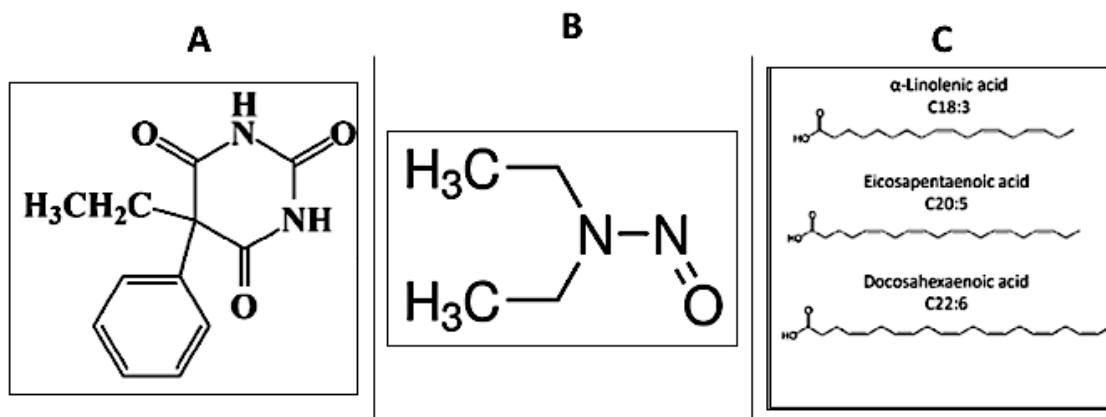

**Figure S1.** Chemical structure of N-Nitrosodiethylamine (A), phenobarbital (B), and n-3 Polyunsaturated fatty acids (C).

**Table S1.** Area % of pSTAT3, Cyclin D1, and Bcl-2 expression in different groups as mean  $\pm$  SD.

**\*\*P-**

| Groups    | Bcl-2                           | Cyclin D                        | pSTAT3                          | F- Value | P-Value |
|-----------|---------------------------------|---------------------------------|---------------------------------|----------|---------|
| Control   | 29.21 $\pm$ 2.744 <sup>a</sup>  | 4.223 $\pm$ 1.496 <sup>a</sup>  | 7.567 $\pm$ 2.512 <sup>a</sup>  | 680.755  | 0.000** |
| DEN       | 83.326 $\pm$ 3.529 <sup>c</sup> | 79.324 $\pm$ 2.452 <sup>c</sup> | 71.547 $\pm$ 2.657 <sup>c</sup> | 2553.082 | 0.000** |
| n-3 PUFAs | 40.564 $\pm$ 1.244 <sup>b</sup> | 14.024 $\pm$ 1.87 <sup>b</sup>  | 25.303 $\pm$ 3.326 <sup>b</sup> | 803.925  | 0.000** |

Values  $\leq 0.001$  are highly significant.

Different superscripts indicate significant difference at  $p \leq 0.05$ .

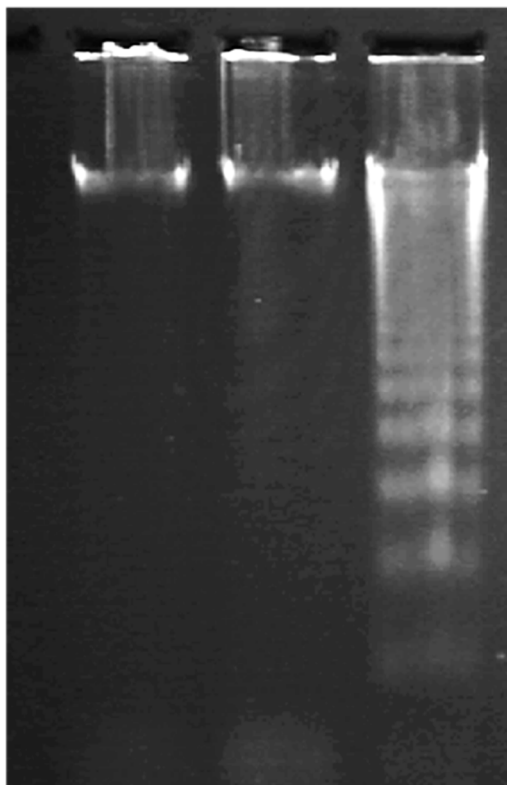

**Figure S2.** Raw gel image of the influence of n-3 PUFAs on DEN-induced hepatic DNA

**Figure S3A**

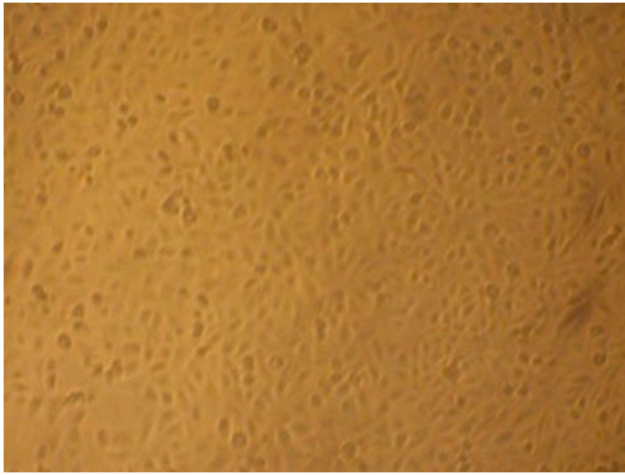

**Figure S3B**

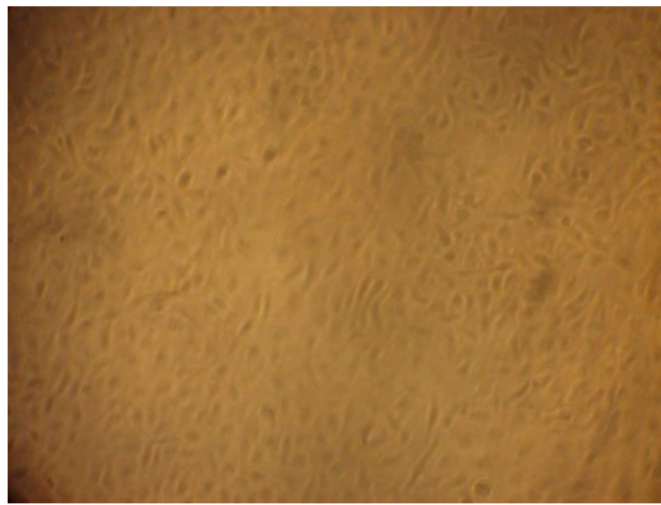

**Figure S3C**

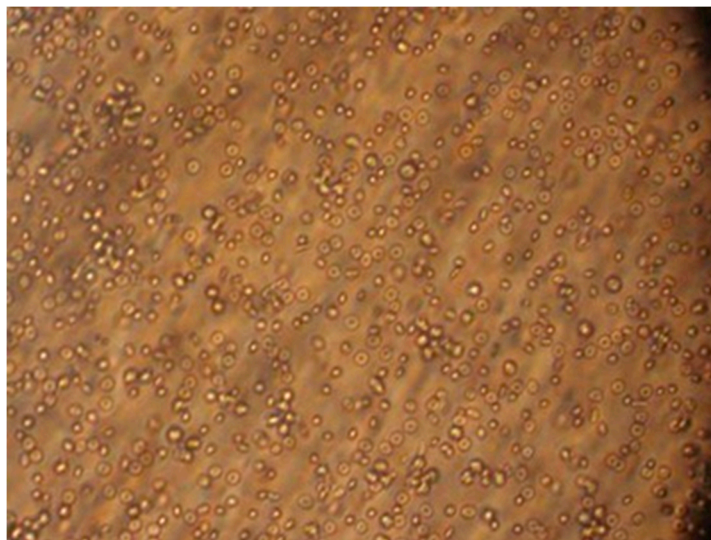

**Figure S3 (A,B,C).** Original images for the morphological changes of HepG2 cells at 40×10 magnifications

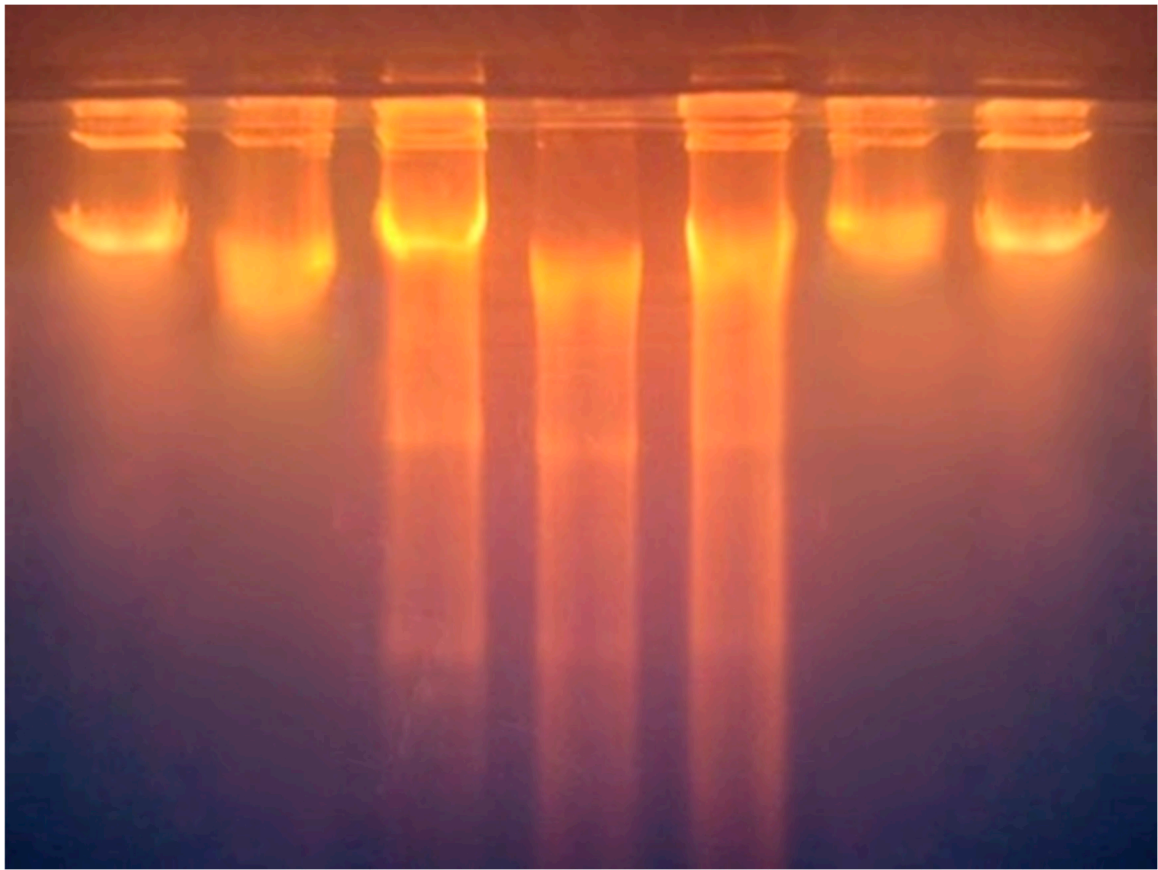

**Figure S4.** Raw gel image for the detection of DNA fragmentation by agarose gel electrophoresis

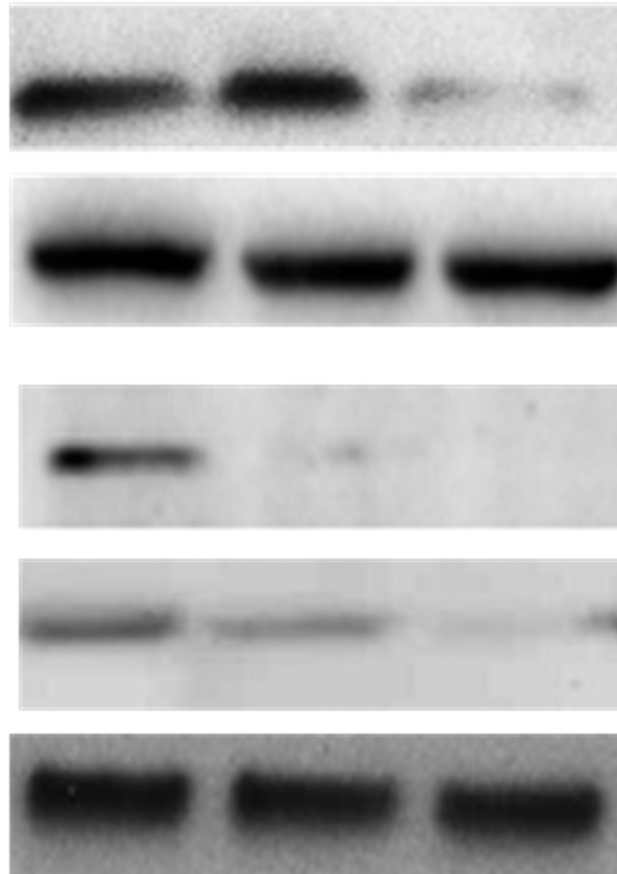

**Figure S5.** Western blot image for p-STAT3, STAT3, Bcl-2, Cyclin D1 and  $\beta$ -actin protein
