# Supplementary material for: Omega-3 Polyunsaturated Fatty Acids Provoke Apoptosis in Hepatocellular Carcinoma through Knocking Down the STAT3 Activated Signaling Pathway: In Vivo and In Vitro Study
Source: Molecules. 2022 May 9;27(9):3032. doi: 10.3390/molecules27093032 (PMC9103886; doi:10.3390/molecules27093032)
Supplement: Supplementary file 1 [file molecules-27-03032-s001.zip › Raw Data of IHC statisticsxlsx.xlsx]

## Sheet: Summary
		Raw Data (BCL2)									Raw Data (Cyclin D1)							Raw Data (pSTAT3)
Group	Count	Total Area	Average Size	%Area					Group	Count	Total Area	Average Size	%Area			Group	Count	Total Area	Average Size	%Area
A	6185	902780	145.963	28.699					A	17295	82125	4.748	2.611			A	3280	270456	82.456	5.602
A	6421	798551	124.366	25.385					A	18203	87534	4.809	2.783			A	3809	352440	92.528	7.3
A	6185	902780	145.963	28.699					A	26836	150214	5.597	4.775			A	5066	605452	119.513	12.541
A	6174	873001	141.4	27.752					A	21801	110365	5.062	3.508			A	3556	313317	88.109	6.49
A	6013	1033358	171.854	32.85					A	28541	166992	5.851	5.309			A	3739	344366	92.101	7.133
A	6058	1002784	165.531	31.878					A	31356	199807	6.372	6.352			A	3528	305840	86.689	6.335
B	1698	2791301	1643.88	88.733					B	3175	39085379	12310.4	79.417			B	7065	41608097	5889.33	76.19
B	1767	2710703	1534.07	86.171					B	3735	38111024	10203.8	77.437			B	7992	38462387	4812.61	70.429
B	2260	2571193	1137.7	81.736					B	3868	37160141	9607.07	75.505			B	7642	39725283	5198.28	72.742
B	1971	2621282	1329.92	83.328					B	2631	40396109	15353.9	82.08			B	8281	37540066	4533.28	68.741
B	2493	2506106	1005.26	79.667					B	2950	39579345	13416.7	80.42			B	8112	38101257	4696.9	69.768
B	2361	2526723	1070.19	80.322					B	2836	39908598	14072.1	81.089			B	7902	39000286	4935.5	71.414
C	19585	1274445	65.073	40.514					C	36038	8503262	235.953	15.571			C	4750	761428	160.301	24.205
C	17881	1243514	69.544	39.53					C	36568	7578818	207.253	13.878			C	4690	742231	158.258	23.595
C	16694	1221300	73.158	38.824					C	39612	6702814	169.212	12.274			C	4734	633494	133.818	20.138
C	22481	1326286	58.996	42.161					C	44299	6226185	140.549	11.401			C	4679	878912	187.842	27.94
C	21460	1308276	60.963	41.589					C	36255	8147637	224.731	14.919			C	4675	920486	196.895	29.261
C	20043	1282527	63.989	40.77					C	35967	8794935	244.528	16.105			C	4713	839301	178.082	26.681
